# Supplementary material
Source: PubMed Central journal article supplement (PMC3341151)
Supplement: supp_JCO.2011.35.6758_356758.pdf [file supp_JCO.2011.35.6758_356758.pdf]

## Survival of Older Cancer Patients in the Veterans Health Administration versus Fee for Service Medicare

Landrum, et al

### Data Supplement Tables 1-7

Appendix Table 1. Cohort inclusion and exclusion criteria

|                                                     | Colorectal Cancer† |               | Lung Cancer‡ |               | Non-Hodgkin's Lymphoma |               | Multiple Myeloma |               |
|-----------------------------------------------------|--------------------|---------------|--------------|---------------|------------------------|---------------|------------------|---------------|
|                                                     | VHA                | SEER-Medicare | VHA          | SEER-Medicare | VHA                    | SEER-Medicare | VHA              | SEER-Medicare |
| Patients diagnosed with first cancer of interest    | 16,289             | 110619        | 28426        | 135000        | 3796                   | 36507         | 1444             | 12332         |
| Age ≤65                                             | 5969               | 12098         | 11107        | 12846         | 1661                   | 5075          | 495              | 1767          |
| Females                                             | 302                | 55581         | 489          | 62183         | 106                    | 17805         | 27               | 5708          |
| Histology unlikely to be primary cancer of interest | 1048               | 3757          | 985          | 4636          | 1408                   | 8747          | 4                | 46            |
| Diagnosed at autopsy or death certificate           | 16                 | 385           | 59           | 1396          | 3                      | 147           | 0                | 119           |
| Unknown reporting source*                           |                    | n/a           | 0            | n/a           | 0                      | n/a           | 0                | n/a           |
| Enrolled in HMO                                     | n/a                | 9370          | n/a          | 13033         | n/a                    | 1193          | n/a              | 1117          |
| Not enrolled in both Medicare parts A/B             | n/a                | 2471          | n/a          | 3429          | n/a                    | 300           | n/a              | 349           |
| Incomplete data or data linkage problem             | 19                 | 526           | 45           | 940           | 1                      | 48            | 3                | 56            |
| <b>Total N</b>                                      | <b>8760</b>        | <b>25296</b>  | <b>15560</b> | <b>36537</b>  | <b>613</b>             | <b>3192</b>   | <b>900</b>       | <b>3170</b>   |

\*Unknown if reporting source was a hospital, office, death certificate, or autopsy.

† Colon and rectal cancer are combined in this cohort

‡ Small cell and NSC lung cancers are combined in this cohort

Appendix Table 2. Demographic and clinical characteristics of the VHA and SEER-Medicare colon cancer cohorts

|                                                     | Before Adjustment |               |         | After Adjustment |               |         |
|-----------------------------------------------------|-------------------|---------------|---------|------------------|---------------|---------|
|                                                     | VHA               | SEER-Medicare | p-value | VHA              | SEER-Medicare | p-value |
| <b>N</b>                                            | <b>7003</b>       | <b>20734</b>  |         | <b>7003</b>      | <b>20734</b>  |         |
| <b>Age (%)</b>                                      |                   |               | <0.001  |                  |               | 0.95    |
| 66-69                                               | 17.8              | 15.0          |         | 17.8             | 18.2          |         |
| 70-74                                               | 28.0              | 23.3          |         | 28.0             | 27.5          |         |
| 75-79                                               | 28.5              | 25.2          |         | 28.5             | 28.3          |         |
| 80-84                                               | 19.2              | 20.9          |         | 19.2             | 19.3          |         |
| 85 and older                                        | 6.5               | 15.7          |         | 6.5              | 6.6           |         |
| <b>Race (%)</b>                                     |                   |               | <0.001  |                  |               | 0.67    |
| White                                               | 78.3              | 90.3          |         | 78.3             | 78.8          |         |
| African American                                    | 16.3              | 8.1           |         | 16.3             | 17.6          |         |
| Hispanic                                            | 5.4               | 1.5           |         | 5.4              | 3.6           |         |
| <b>Missing Race (%)</b>                             | 2.1               | 4.9           | <0.001  | 2.1              | 1.9           | 0.78    |
| <b>Marital Status (%)</b>                           |                   |               | <0.001  |                  |               | 0.49    |
| Single                                              | 44.0              | 29.4          |         | 44.0             | 45.1          |         |
| Married                                             | 56.0              | 70.6          |         | 56.0             | 54.9          |         |
| <b>Missing Marital Status (%)</b>                   | 2.6               | 3.1           | 0.043   | 2.6              | 2.7           | 0.86    |
| <b>Census Region (%)</b>                            |                   |               | <0.001  |                  |               | 0.99    |
| Northeast                                           | 17.1              | 25.1          |         | 17.1             | 17.5          |         |
| Midwest                                             | 20.0              | 15.8          |         | 20.0             | 20.4          |         |
| South                                               | 46.2              | 19.2          |         | 46.2             | 44.4          |         |
| West                                                | 16.7              | 39.9          |         | 16.7             | 17.7          |         |
| <b>Socioeconomic Variables*</b>                     |                   |               |         |                  |               |         |
| % with college degree in zip code of residence      | 25.6              | 31.7          | <0.001  | 25.6             | 25.5          | 0.89    |
| % professionals in zip code of residence            | 29.5              | 34.3          | <0.001  | 29.5             | 29.6          | 0.77    |
| Median household income in zip code of residence    | 44800             | 56500         | <0.001  | 44800            | 46400         | 0.28    |
| % age 65+ income < poverty in zip code of residence | 12.5              | 9.2           | <0.001  | 12.5             | 12.0          | 0.61    |
| % Hispanic in zip code of residence                 | 12.2              | 11.7          | 0.110   | 12.2             | 9.5           | 0.39    |
| % African American in zip code of residence         | 16.1              | 10.1          | <0.001  | 16.1             | 16.9          | 0.81    |
| <b>Missing census data (%)</b>                      | 5.7               | 2.9           | <0.001  | 5.7              | 7.4           | 0.12    |
| <b>Charlson Comorbidity Score (%)</b>               |                   |               | <0.001  |                  |               | 0.94    |
| 0                                                   | 44.4              | 49.0          |         | 44.4             | 44.4          |         |
| 1                                                   | 30.8              | 26.6          |         | 30.8             | 30.5          |         |
| 2                                                   | 14.1              | 13.4          |         | 14.1             | 14.2          |         |
| 3 or more                                           | 10.7              | 11.0          |         | 10.7             | 11.0          |         |
| <b>Prior cancer (%)</b>                             | 16.7              | 23.5          | <0.001  | 16.7             | 16.6          | 0.90    |

Appendix Table 3. Demographic and clinical characteristics of the VHA and SEER-Medicare rectal cancer cohorts

|                                                     | Before Adjustment |               |         | After Adjustment |               |         |
|-----------------------------------------------------|-------------------|---------------|---------|------------------|---------------|---------|
|                                                     | VHA               | SEER-Medicare | p-value | VHA              | SEER-Medicare | p-value |
| <b>N</b>                                            | <b>1757</b>       | <b>4562</b>   |         | <b>1757</b>      | <b>20734</b>  |         |
| <b>Age (%)</b>                                      |                   |               | <0.001  |                  |               | 0.67    |
| 66-69                                               | 18.1              | 17.8          |         | 18.1             | 19.5          |         |
| 70-74                                               | 30.4              | 25.6          |         | 30.4             | 30.8          |         |
| 75-79                                               | 28.1              | 25.3          |         | 28.1             | 28.0          |         |
| 80-84                                               | 18.5              | 18.5          |         | 18.5             | 16.8          |         |
| 85 and older                                        | 5.0               | 12.8          |         | 5.0              | 4.9           |         |
| <b>Race (%)</b>                                     |                   |               | <0.001  |                  |               | 0.52    |
| White                                               | 80.8              | 92.0          |         | 80.8             | 81.1          |         |
| African American                                    | 13.7              | 6.0           |         | 13.7             | 15.6          |         |
| Hispanic                                            | 5.5               | 2.0           |         | 5.5              | 3.4           |         |
| <b>Missing Race (%)</b>                             | 2.3               | 5.6           | <0.001  | 2.3              | 2.0           | 0.71    |
| <b>Marital Status (%)</b>                           |                   |               | <0.001  |                  |               | 0.36    |
| Single                                              | 44.8              | 29.4          |         | 44.8             | 46.7          |         |
| Married                                             | 55.2              | 70.6          |         | 55.2             | 53.3          |         |
| <b>Missing Marital Status (%)</b>                   | 2.5               | 3.4           | 0.063   | 2.5              | 2.6           | 0.93    |
| <b>Census Region (%)</b>                            |                   |               | <0.001  |                  |               | 0.99    |
| Northeast                                           | 15.9              | 24.6          |         | 15.9             | 16.4          |         |
| Midwest                                             | 21.1              | 15.4          |         | 21.1             | 21.7          |         |
| South                                               | 45.7              | 18.8          |         | 45.7             | 43.0          |         |
| West                                                | 17.3              | 41.3          |         | 17.3             | 18.9          |         |
| <b>Socioeconomic Variables*</b>                     |                   |               |         |                  |               |         |
| % with college degree in zip code of residence      | 24.6              | 30.8          | <0.001  | 24.5             | 24.6          | 0.96    |
| % professionals in zip code of residence            | 28.8              | 33.6          | <0.001  | 28.8             | 28.8          | 0.96    |
| Median household income in zip code of residence    | 44400             | 55500         | <0.001  | 44400            | 45500         | 0.47    |
| % age 65+ income < poverty in zip code of residence | 12.3              | 9.2           | <0.001  | 12.3             | 11.9          | 0.66    |
| % Hispanic in zip code of residence                 | 12.9              | 12.5          | 0.55    | 12.9             | 10.6          | 0.47    |
| % African American in zip code of residence         | 14.0              | 9.1           | <0.001  | 14.0             | 14.7          | 0.81    |
| <b>Missing census data (%)</b>                      | 4.7               | 2.9           | <0.001  | 4.7              | 6.9           | 0.09    |
| <b>Charlson Comorbidity Score (%)</b>               |                   |               | <0.001  |                  |               | 0.98    |
| 0                                                   | 51.0              | 57.1          |         | 51.0             | 51.3          |         |
| 1                                                   | 29.7              | 25.0          |         | 29.7             | 29.2          |         |
| 2                                                   | 11.0              | 10.0          |         | 11.0             | 11.4          |         |
| 3 or more                                           | 8.3               | 8.0           |         | 8.3              | 8.1           |         |
| <b>Prior cancer (%)</b>                             | 16.1              | 23.3          | <0.001  | 16.1             | 15.5          | 0.72    |

Appendix Table 4. Demographic and clinical characteristics of the VHA and SEER-Medicare NSC lung cancer cohorts

|                                                     | Before Adjustment |               |         | After Adjustment |               |         |
|-----------------------------------------------------|-------------------|---------------|---------|------------------|---------------|---------|
|                                                     | VHA               | SEER-Medicare | p-value | VHA              | SEER-Medicare | p-value |
| <b>N</b>                                            | <b>13434</b>      | <b>31868</b>  |         | <b>13434</b>     | <b>31868</b>  |         |
| <b>Age (%)</b>                                      |                   |               | <0.001  |                  |               | 0.86    |
| 66-69                                               | 21.9              | 18.3          |         | 21.9             | 22.5          |         |
| 70-74                                               | 30.5              | 27.3          |         | 30.5             | 30.2          |         |
| 75-79                                               | 29.2              | 26.9          |         | 29.2             | 28.9          |         |
| 80-84                                               | 15.0              | 18.0          |         | 15.0             | 15.0          |         |
| 85 and older                                        | 3.4               | 9.6           |         | 3.4              | 3.4           |         |
| <b>Race (%)</b>                                     |                   |               | <0.001  |                  |               | 0.79    |
| White                                               | 80.7              | 89.4          |         | 80.7             | 80.2          |         |
| African American                                    | 17.2              | 9.1           |         | 17.2             | 18.2          |         |
| Hispanic                                            | 2.2               | 1.5           |         | 2.2              | 1.6           |         |
| <b>Missing Race (%)</b>                             | 1.5               | 4.7           | <0.001  | 1.5              | 1.4           | 0.85    |
| <b>Marital Status (%)</b>                           |                   |               | <0.001  |                  |               | 0.59    |
| Single                                              | 47.7              | 31.9          |         | 47.7             | 48.4          |         |
| Married                                             | 52.3              | 68.1          |         | 52.3             | 51.6          |         |
| <b>Missing Marital Status (%)</b>                   | 2.3               | 2.6           | 0.098   | 2.3              | 2.3           | 0.95    |
| <b>Census Region (%)</b>                            |                   |               | <0.001  |                  |               | 0.99    |
| Northeast                                           | 14.6              | 22.1          |         | 14.6             | 14.6          |         |
| Midwest                                             | 21.3              | 15.8          |         | 21.3             | 21.2          |         |
| South                                               | 46.9              | 23.5          |         | 46.9             | 46.4          |         |
| West                                                | 17.2              | 38.6          |         | 17.2             | 17.8          |         |
| <b>Socioeconomic Variables*</b>                     |                   |               |         |                  |               |         |
| % with college degree in zip code of residence      | 24.6              | 29.7          | <0.001  | 24.6             | 24.5          | 0.90    |
| % professionals in zip code of residence            | 28.9              | 32.9          | <0.001  | 28.9             | 28.9          | 0.94    |
| Median household income in zip code of residence    | 44500             | 54000         | <0.001  | 44500            | 45300         | 0.49    |
| % age 65+ income < poverty in zip code of residence | 12.2              | 9.7           | <0.001  | 12.2             | 12.2          | 0.98    |
| % Hispanic in zip code of residence                 | 10.3              | 11.6          | <0.001  | 10.3             | 9.1           | 0.58    |
| % African American in zip code of residence         | 16.8              | 10.7          | <0.001  | 16.8             | 17.3          | 0.88    |
| <b>Missing census data (%)</b>                      | 4.6               | 2.9           | <0.001  | 4.6              | 5.6           | 0.24    |
| <b>Charlson Comorbidity Score (%)</b>               |                   |               | <0.001  |                  |               | 0.60    |
| 0                                                   | 54.1              | 56.9          |         | 54.1             | 54.1          |         |
| 1                                                   | 25.8              | 24.4          |         | 25.8             | 25.9          |         |
| 2                                                   | 12.2              | 10.8          |         | 12.2             | 12.2          |         |
| 3 or more                                           | 7.9               | 8.0           |         | 7.9              | 7.8           |         |
| <b>COPD (%)</b>                                     | 45.0              | 41.8          | <0.001  | 45.0             | 44.9          | 0.94    |
| <b>Prior cancer (%)</b>                             | 21.3              | 25.9          | <0.001  | 21.3             | 20.6          | 0.45    |

Appendix Table 5. Demographic and clinical characteristics of the VHA and SEER-Medicare small cell lung cancer cohorts

|                                                     | Before Adjustment |               |         | After Adjustment |               |         |
|-----------------------------------------------------|-------------------|---------------|---------|------------------|---------------|---------|
|                                                     | VHA               | SEER-Medicare | p-value | VHA              | SEER-Medicare | p-value |
| <b>N</b>                                            | <b>2111</b>       | <b>4669</b>   |         | <b>2111</b>      | <b>4669</b>   |         |
| <b>Age (%)</b>                                      |                   |               | <0.001  |                  |               | 0.99    |
| 66-69                                               | 24.4              | 21.2          |         | 24.4             | 24.4          |         |
| 70-74                                               | 32.6              | 28.7          |         | 32.6             | 31.9          |         |
| 75-79                                               | 27.6              | 28.0          |         | 27.6             | 28.1          |         |
| 80-84                                               | 12.4              | 15.1          |         | 12.4             | 12.6          |         |
| 85 and older                                        | 3.0               | 7.1           |         | 3.0              | 3.0           |         |
| <b>Race (%)</b>                                     |                   |               | <0.001  |                  |               | 0.96    |
| White                                               | 85.1              | 91.7          |         | 85.1             | 85.5          |         |
| African American                                    | 12.6              | 6.9           |         | 12.6             | 12.5          |         |
| Hispanic                                            | 2.3               | 1.4           |         | 2.3              | 2.0           |         |
| <b>Missing Race (%)</b>                             | 1.5               | 4.0           | <0.001  | 1.5              | 1.3           | 0.80    |
| <b>Marital Status (%)</b>                           |                   |               | <0.001  |                  |               | 0.99    |
| Single                                              | 46.9              | 30.8          |         | 46.9             | 46.9          |         |
| Married                                             | 53.1              | 69.3          |         | 53.1             | 53.1          |         |
| <b>Missing Marital Status (%)</b>                   | 1.8               | 2.3           | 0.30    | 1.8              | 2.0           | 0.92    |
| <b>Census Region (%)</b>                            |                   |               | <0.001  |                  |               | 0.99    |
| Northeast                                           | 13.8              | 20.5          |         | 13.8             | 14.6          |         |
| Midwest                                             | 24.8              | 17.3          |         | 24.8             | 21.2          |         |
| South                                               | 43.9              | 25.7          |         | 43.9             | 46.4          |         |
| West                                                | 17.5              | 36.5          |         | 17.5             | 17.8          |         |
| <b>Socioeconomic Variables*</b>                     |                   |               |         |                  |               |         |
| % with college degree in zip code of residence      | 24.6              | 28.8          | <0.001  | 24.6             | 24.6          | 0.96    |
| % professionals in zip code of residence            | 28.8              | 32.1          | <0.001  | 28.8             | 28.9          | 0.77    |
| Median household income in zip code of residence    | 45200             | 53000         | <0.001  | 45200            | 46200         | 0.44    |
| % age 65+ income < poverty in zip code of residence | 11.5              | 9.8           | <0.001  | 11.5             | 11.6          | 0.89    |
| % Hispanic in zip code of residence                 | 10.0              | 11.5          | <0.001  | 10.0             | 9.1           | 0.67    |
| % African American in zip code of residence         | 14.0              | 9.8           | <0.001  | 14.0             | 14.3          | 0.91    |
| <b>Missing census data (%)</b>                      | 4.7               | 2.6           | <0.001  | 4.7              | 6.0           | 0.24    |
| <b>Charlson Comorbidity Score (%)</b>               |                   |               | 0.192   |                  |               | 0.94    |
| 0                                                   | 53.0              | 55.2          |         | 53.0             | 52.7          |         |
| 1                                                   | 25.3              | 24.9          |         | 25.3             | 25.1          |         |
| 2                                                   | 12.4              | 10.8          |         | 12.4             | 12.9          |         |
| 3 or more                                           | 9.3               | 9.1           |         | 9.3              | 9.3           |         |
| <b>COPD (%)</b>                                     | 44.5              | 42.9          | 0.204   | 44.5             | 44.6          | 0.98    |
| <b>Prior cancer (%)</b>                             | 19.2              | 21.7          | 0.022   | 19.2             | 19.8          | 0.68    |

Appendix Table 6. Demographic and clinical characteristics of the VHA and SEER-Medicare diffuse large B-cell lymphoma cohorts

|                                                     | Before Adjustment |               |         | After Adjustment |               |         |
|-----------------------------------------------------|-------------------|---------------|---------|------------------|---------------|---------|
|                                                     | VHA               | SEER-Medicare | p-value | VHA              | SEER-Medicare | p-value |
| <b>N</b>                                            | <b>613</b>        | <b>3192</b>   |         | <b>613</b>       | <b>3192</b>   |         |
| <b>Age (%)</b>                                      |                   |               | <0.001  |                  |               | 0.99    |
| 66-69                                               | 16.0              | 14.4          |         | 16.0             | 16.2          |         |
| 70-74                                               | 24.6              | 22.6          |         | 24.6             | 24.7          |         |
| 75-79                                               | 29.2              | 25.9          |         | 29.2             | 28.7          |         |
| 80-84                                               | 23.0              | 22.7          |         | 23.0             | 23.0          |         |
| 85 and older                                        | 7.2               | 14.4          |         | 7.2              | 7.5           |         |
| <b>Race (%)</b>                                     |                   |               | <0.001  |                  |               | 0.51    |
| White                                               | 88.8              | 94.4          |         | 88.8             | 89.7          |         |
| African American                                    | 6.2               | 3.3           |         | 6.2              | 7.3           |         |
| Hispanic                                            | 5.0               | 2.3           |         | 5.0              | 3.0           |         |
| <b>Missing Race (%)</b>                             | 2.4               | 5.0           | 0.005   | 2.4              | 2.2           | 0.81    |
| <b>Marital Status (%)</b>                           |                   |               | <0.001  |                  |               | 0.82    |
| Single                                              | 43.4              | 24.9          |         | 43.4             | 43.9          |         |
| Married                                             | 56.6              | 75.2          |         | 56.6             | 56.1          |         |
| <b>Missing Marital Status (%)</b>                   | 1.1               | 3.1           | 0.008   | 1.1              | 1.2           | 0.93    |
| <b>Census Region (%)</b>                            |                   |               | <0.001  |                  |               | 0.99    |
| Northeast                                           | 13.5              | 23.5          |         | 13.5             | 13.5          |         |
| Midwest                                             | 21.5              | 15.7          |         | 21.5             | 21.5          |         |
| South                                               | 42.6              | 16.5          |         | 42.6             | 42.6          |         |
| West                                                | 22.4              | 44.2          |         | 22.4             | 22.4          |         |
| <b>Socioeconomic Variables*</b>                     |                   |               |         |                  |               |         |
| % with college degree in zip code of residence      | 27.6              | 34.2          | <0.001  | 27.6             | 27.5          | 0.96    |
| % professionals in zip code of residence            | 31.0              | 36.1          | <0.001  | 31.0             | 31.1          | 0.86    |
| Median household income in zip code of residence    | 47300             | 59600         | <0.001  | 47300            | 49100         | 0.40    |
| % age 65+ income < poverty in zip code of residence | 11.2              | 8.4           | <0.001  | 11.2             | 10.9          | 0.38    |
| % Hispanic in zip code of residence                 | 11.7              | 11.5          | 0.85    | 11.7             | 9.5           | 0.44    |
| % African American in zip code of residence         | 10.6              | 7.3           | <0.001  | 10.6             | 10.4          | 0.93    |
| <b>Missing census data (%)</b>                      | 4.6               | 2.7           | 0.011   | 4.6              | 5.4           | 0.55    |
| <b>Charlson Comorbidity Score (%)</b>               |                   |               | 0.001   |                  |               | 0.98    |
| 0                                                   | 41.3              | 50.0          |         | 41.3             | 41.2          |         |
| 1                                                   | 31.5              | 25.8          |         | 31.5             | 32.3          |         |
| 2                                                   | 14.7              | 13.0          |         | 14.7             | 14.3          |         |
| 3 or more                                           | 12.6              | 11.2          |         | 12.6             | 12.1          |         |
| <b>Prior cancer (%)</b>                             | 19.3              | 25.9          | <0.001  | 19.3             | 19.1          | 0.94    |

Appendix Table 7. Demographic and clinical characteristics of the VHA and SEER-Medicare multiple myeloma cohorts

|                                                     | Before Adjustment |               |         | After Adjustment |               |         |
|-----------------------------------------------------|-------------------|---------------|---------|------------------|---------------|---------|
|                                                     | VHA               | SEER-Medicare | p-value | VHA              | SEER-Medicare | p-value |
| <b>N</b>                                            | <b>900</b>        | <b>3170</b>   |         | <b>900</b>       | <b>3170</b>   |         |
| <b>Age (%)</b>                                      |                   |               | <0.001  |                  |               | 0.99    |
| 66-69                                               | 18.6              | 16.9          |         | 18.6             | 18.7          |         |
| 70-74                                               | 25.0              | 24.8          |         | 25.0             | 24.8          |         |
| 75-79                                               | 28.4              | 25.5          |         | 28.4             | 28.7          |         |
| 80-84                                               | 23.1              | 19.6          |         | 23.1             | 23.2          |         |
| 85 and older                                        | 4.9               | 13.2          |         | 4.9              | 4.7           |         |
| <b>Race (%)</b>                                     |                   |               | <0.001  |                  |               | 0.62    |
| White                                               | 64.7              | 82.9          |         | 64.7             | 65.7          |         |
| African American                                    | 27.8              | 14.6          |         | 27.8             | 27.8          |         |
| Hispanic                                            | 6.5               | 2.4           |         | 6.5              | 6.5           |         |
| <b>Missing Race (%)</b>                             | 2.1               | 3.2           | 0.092   | 2.1              | 2.0           | 0.91    |
| <b>Marital Status (%)</b>                           |                   |               | <0.001  |                  |               | 0.67    |
| Single                                              | 39.0              | 26.5          |         | 39.0             | 40.1          |         |
| Married                                             | 61.0              | 73.5          |         | 61.0             | 59.9          |         |
| <b>Missing Marital Status (%)</b>                   | 1.9               | 4.9           | <0.001  | 1.9              | 2.0           | 0.88    |
| <b>Census Region (%)</b>                            |                   |               | <0.001  |                  |               | 0.99    |
| Northeast                                           | 14.6              | 22.6          |         | 14.6             | 14.4          |         |
| Midwest                                             | 21.8              | 17.6          |         | 21.8             | 22.2          |         |
| South                                               | 43.7              | 19.2          |         | 43.7             | 42.8          |         |
| West                                                | 20.0              | 40.7          |         | 20.0             | 20.7          |         |
| <b>Socioeconomic Variables*</b>                     |                   |               |         |                  |               |         |
| % with college degree in zip code of residence      | 26.8              | 32.4          | <0.001  | 26.8             | 26.5          | 0.77    |
| % professionals in zip code of residence            | 30.4              | 34.9          | <0.001  | 30.4             | 30.4          | 0.96    |
| Median household income in zip code of residence    | 45300             | 57300         | <0.001  | 45300            | 47400         | 0.23    |
| % age 65+ income < poverty in zip code of residence | 13.0              | 9.4           | <0.001  | 13.0             | 12.4          | 0.60    |
| % Hispanic in zip code of residence                 | 13.0              | 11.7          | 0.099   | 13.0             | 10.2          | 0.45    |
| % African American in zip code of residence         | 20.2              | 12.3          | <0.001  | 20.2             | 20.1          | 0.99    |
| <b>Missing census data (%)</b>                      | 6.7               | 2.8           | <0.001  | 6.7              | 8.9           | 0.29    |
| <b>Charlson Comorbidity Score (%)</b>               |                   |               | 0.001   |                  |               | 0.96    |
| 0                                                   | 40.1              | 47.5          |         | 40.1             | 39.7          |         |
| 1                                                   | 25.4              | 23.2          |         | 25.4             | 25.3          |         |
| 2                                                   | 17.2              | 14.2          |         | 17.2             | 18.1          |         |
| 3 or more                                           | 17.2              | 15.1          |         | 17.2             | 16.9          |         |
| <b>Prior cancer (%)</b>                             | 20.0              | 24.3          | 0.008   | 20.0             | 20.0          | 0.99    |
